# Supplementary material for: Three sra topological lanthanide–organic frameworks built from 2,2′-dimethoxy-4,4′-biphenyldicarboxylic acid
Source: Royal Society of Chemistry journal article supplement (doi:10.1039/c5dt00602c), 2015-01-01
Supplement: c5dt00602c1.pdf [file c5dt00602c1.pdf]

## Electronic Supplementary Information (ESI)

### Three sra topological lanthanide-organic frameworks built from 2,2'-dimethoxy-4,4'-biphenyldicarboxylic acid

Xin Wang,<sup>a</sup> Jie Zhao,<sup>a</sup> Yan Zhao,<sup>c</sup> Heng Xu,<sup>a</sup> Xuan Shen,<sup>a</sup> Dun-Ru Zhu<sup>\*,a,d</sup> and Su Jing<sup>\*,b</sup>

<sup>a</sup> College of Chemistry and Chemical Engineering, State Key Laboratory of Materials-oriented Chemical Engineering, <sup>b</sup> College of Science, Nanjing Tech University, Nanjing 210009, P. R. China, <sup>c</sup> School of Environmental Science and Engineering, North China

Electric Power University, Baoding, 071003, Hebei, P. R. China, <sup>d</sup> State Key Laboratory of Coordination Chemistry, Nanjing University, Nanjing 210093, P. R. China

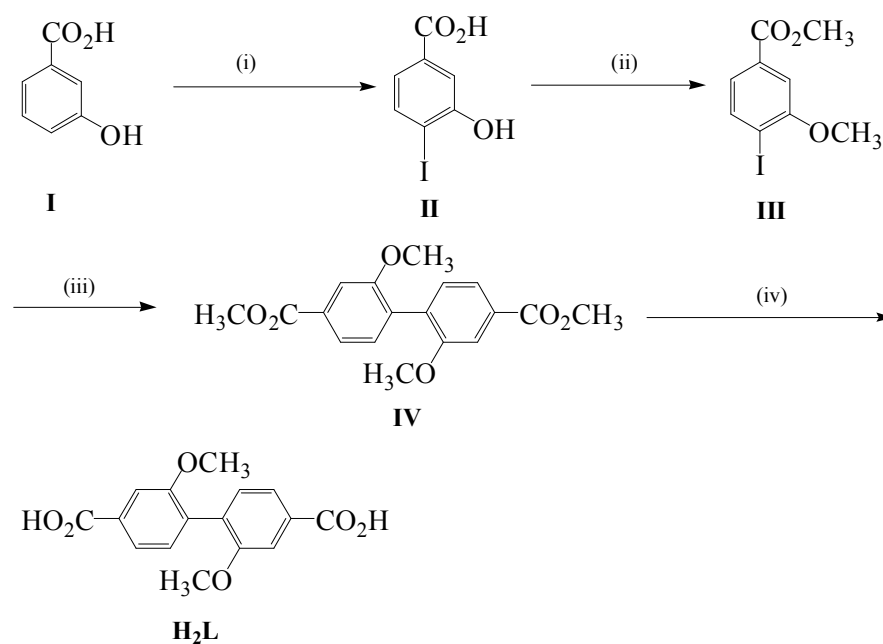

**Scheme S1.** The synthetic route of 2,2'-dimethoxy-biphenyl-4,4'-dicarboxylic acid (H<sub>2</sub>L): (i) concentrated aqueous ammonia, KI, I<sub>2</sub>, H<sub>2</sub>O, (ii) dimethyl sulfate, K<sub>2</sub>CO<sub>3</sub>, acetone, (iii) activated copper powder, 210-220 °C, (iv) a) KOH, methanol, reflux, 1h; b) HCl.

The commercially available *m*-hydroxybenzoic acid (**I**) reacting with potassium iodide and iodine in concentrated aqueous ammonia solution gave 3-hydroxy-4-iodobenzoic acid (**II**) in a yield of 62%.<sup>1</sup> Brief treatment of **II** with (CH<sub>3</sub>)<sub>2</sub>SO<sub>4</sub> produced methyl 4-iodo-3-methoxybenzoate (**III**) in a yield of 84%.<sup>2</sup> By use of the Ullmann reaction **III** was converted into dimethyl 2,2'-dimethoxy-4,4'-biphenyldicarboxylate (**IV**) in a yield of 74% under argon atmosphere.<sup>3</sup>

**Table S1** Selected bond lengths (Å) for LOFs **1–3**

|                       | <b>1</b> |                       | <b>2</b> |                         | <b>3</b> |
|-----------------------|----------|-----------------------|----------|-------------------------|----------|
| Eu1-O2 <sup>i</sup>   | 2.314(4) | Gd1-O2 <sup>i</sup>   | 2.309(3) | Dy1-O2 <sup>v</sup>     | 2.276(4) |
| Eu1-O1                | 2.338(3) | Gd1-O1                | 2.328(3) | Dy1-O1                  | 2.297(3) |
| Eu1-O4 <sup>ii</sup>  | 2.340(3) | Gd1-O4 <sup>ii</sup>  | 2.334(3) | Dy1-O4 <sup>vi</sup>    | 2.304(4) |
| Eu1-O3 <sup>iii</sup> | 2.355(3) | Gd1-O3 <sup>iii</sup> | 2.341(3) | Dy1-O3 <sup>vii</sup>   | 2.306(3) |
| Eu1-O7                | 2.389(4) | Gd1-O7                | 2.381(3) | Dy1-O7                  | 2.362(4) |
| Eu1-O8 <sup>i</sup>   | 2.434(4) | Gd1-O8 <sup>i</sup>   | 2.430(3) | Dy1-O8 <sup>v</sup>     | 2.410(4) |
| Eu1-O9                | 2.528(4) | Gd1-O9                | 2.512(3) | Dy1-O9                  | 2.491(4) |
| Eu1-O8                | 2.579(4) | Gd1-O8                | 2.568(3) | Dy1-O8                  | 2.548(4) |
| Eu1-Eu1 <sup>iv</sup> | 4.448(4) | Gd1-Gd1 <sup>iv</sup> | 4.445(3) | Dy1-Dy1 <sup>viii</sup> | 4.414(4) |

Symmetry codes: i)  $-x, 3-y, z-1/2$ ; ii)  $1/2-x, y-1/2, z-1/2$ ; iii)  $x-1/2, 7/2-y, z$ ; iv)  $-x, 3-y, z+1/2$ ; v)  $2-x, -y-1, z+1/2$ ; vi)  $3/2-x, y+1/2, z+1/2$ ; vii)  $x+1/2, -y-3/2, z$ ; viii)  $2-x, -y-1, z-1/2$ .

**Table S2** Selected bond angles (°) for LOFs **1–3**

| <b>1</b>                                |            |                                        |            |                           |            |
|-----------------------------------------|------------|----------------------------------------|------------|---------------------------|------------|
| O1–Eu1–O2 <sup>i</sup>                  | 155.13(14) | O3 <sup>iii</sup> –Eu1–O7              | 143.40(14) | O3 <sup>iii</sup> –Eu1–O9 | 79.93(13)  |
| O2 <sup>i</sup> –Eu1–O4 <sup>ii</sup>   | 81.78 (13) | O2 <sup>i</sup> –Eu1–O8 <sup>i</sup>   | 80.77(14)  | O7–Eu1–O9                 | 71.80(14)  |
| O1–Eu1–O4 <sup>ii</sup>                 | 82.24(12)  | O1–Eu1–O8 <sup>i</sup>                 | 76.47(12)  | O8 <sup>i</sup> –Eu1–O9   | 146.93(12) |
| O2 <sup>i</sup> –Eu1–O3 <sup>iii</sup>  | 80.69(13)  | O4 <sup>ii</sup> –Eu1–O8 <sup>i</sup>  | 73.46(12)  | O2 <sup>i</sup> –Eu1–O8   | 121.43(13) |
| O1–Eu1–O3 <sup>iii</sup>                | 102.71(13) | O3 <sup>iii</sup> –Eu1–O8 <sup>i</sup> | 75.04(11)  | O1–Eu1–O8                 | 82.49(12)  |
| O4 <sup>ii</sup> –Eu1–O3 <sup>iii</sup> | 145.93(13) | O7–Eu1–O8 <sup>i</sup>                 | 139.11(13) | O4 <sup>ii</sup> –Eu1–O8  | 141.47(12) |
| O2 <sup>i</sup> –Eu1–O7                 | 112.17(14) | O2 <sup>i</sup> –Eu1–O9                | 74.07(14)  | O7–Eu1–O8                 | 72.02(13)  |

|                                         |            |                                        |            |                           |            |
|-----------------------------------------|------------|----------------------------------------|------------|---------------------------|------------|
| O1–Eu1–O7                               | 79.97(15)  | O1–Eu1–O9                              | 130.78(14) | O8 <sup>i</sup> –Eu1–O8   | 135.68(7)  |
| O4 <sup>ii</sup> –Eu1–O7                | 70.59(13)  | O4 <sup>ii</sup> –Eu1–O9               | 122.45(13) | O9–Eu1–O8                 | 50.99(12)  |
| O3 <sup>iii</sup> –Eu1–O8               | 72.20(11)  | Eu1 <sup>iv</sup> –O8–Eu1              | 125.05(14) |                           |            |
| <b>2</b>                                |            |                                        |            |                           |            |
| O2 <sup>i</sup> –Gd1–O1                 | 155.36(12) | O2 <sup>i</sup> –Gd1–O8 <sup>i</sup>   | 80.79(12)  | O7–Gd1–O9                 | 71.88(13)  |
| O2 <sup>i</sup> –Gd1–O4 <sup>ii</sup>   | 81.94(11)  | O1–Gd1–O8 <sup>i</sup>                 | 76.53(11)  | O8 <sup>i</sup> –Gd1–O9   | 146.49(11) |
| O1–Gd1–O4 <sup>ii</sup>                 | 82.52(11)  | O4 <sup>ii</sup> –Gd1–O8 <sup>i</sup>  | 73.54(11)  | O2 <sup>i</sup> –Gd1–O8   | 121.41(11) |
| O2 <sup>i</sup> –Gd1–O3 <sup>iii</sup>  | 81.19(12)  | O3 <sup>iii</sup> –Gd1–O8 <sup>i</sup> | 74.75(10)  | O1–Gd1–O8                 | 82.24(10)  |
| O1–Gd1–O3 <sup>iii</sup>                | 101.75(11) | O7–Gd1–O8 <sup>i</sup>                 | 139.20(12) | O4 <sup>ii</sup> –Gd1–O8  | 141.02(10) |
| O4 <sup>ii</sup> –Gd1–O3 <sup>iii</sup> | 146.00(11) | O2 <sup>i</sup> –Gd1–O9                | 73.53(12)  | O3 <sup>iii</sup> –Gd1–O8 | 72.50(10)  |
| O2 <sup>i</sup> –Gd1–O7                 | 111.57(13) | O1–Gd1–O9                              | 131.10(12) | O7–Gd1–O8                 | 71.97(11)  |
| O1–Gd1–O7                               | 80.68(13)  | O4 <sup>ii</sup> –Gd1–O9               | 122.34(11) | O8 <sup>i</sup> –Gd1–O8   | 136.01(6)  |
| O4 <sup>ii</sup> –Gd1–O7                | 70.26(11)  | O3 <sup>iii</sup> –Gd1–O9              | 80.27(11)  | O9–Gd1–O8                 | 51.31(10)  |
| O3 <sup>iii</sup> –Gd1–O7               | 143.68(12) | Gd1 <sup>iv</sup> –O8–Gd1              | 125.57(11) |                           |            |
| <b>3</b>                                |            |                                        |            |                           |            |
| O2 <sup>iv</sup> –Dy1–O1                | 155.66(15) | O2 <sup>iv</sup> –Dy1–O8 <sup>iv</sup> | 80.75(15)  | O7–Dy1–O9                 | 71.45(15)  |
| O2 <sup>iv</sup> –Dy1–O4 <sup>v</sup>   | 82.20(14)  | O1–Dy1–O8 <sup>iv</sup>                | 77.09(13)  | O8 <sup>iv</sup> –Dy1–O9  | 146.50(13) |
| O1–Dy1–O4 <sup>v</sup>                  | 82.08(13)  | O4 <sup>v</sup> –Dy1–O8 <sup>iv</sup>  | 73.80(13)  | O2 <sup>iv</sup> –Dy1–O8  | 121.95(14) |
| O2 <sup>v</sup> –Dy1–O3 <sup>vii</sup>  | 81.11(14)  | O3 <sup>vii</sup> –Dy1–O8 <sup>v</sup> | 74.69(12)  | O1–Dy1–O8                 | 81.54(12)  |
| O1–Dy1–O3 <sup>vii</sup>                | 102.36(13) | O7–Dy1–O8 <sup>v</sup>                 | 139.60(14) | O4 <sup>vi</sup> –Dy1–O8  | 140.55(13) |
| O4 <sup>vi</sup> –Dy1–O3 <sup>vii</sup> | 146.25(14) | O2 <sup>v</sup> –Dy1–O9                | 73.83(16)  | O3 <sup>vii</sup> –Dy1–O8 | 72.62(12)  |
| O2 <sup>v</sup> –Dy1–O7                 | 111.01(15) | O1–Dy1–O9                              | 130.48(15) | O7–Dy1–O8                 | 72.02(13)  |
| O1–Dy1–O7                               | 80.65(15)  | O4 <sup>vi</sup> –Dy1–O9               | 122.59(14) | O8 <sup>v</sup> –Dy1–O8   | 135.68(8)  |
| O4 <sup>vi</sup> –Dy1–O7                | 70.04(14)  | O3 <sup>vii</sup> –Dy1–O9              | 80.08(14)  | O9–Dy1–O8                 | 51.50(13)  |
| O3 <sup>vii</sup> –Dy1–O7               | 143.63(15) | Dy1 <sup>viii</sup> –O8–Dy1            | 125.81(14) |                           |            |

Symmetry codes: i)  $-x, 3-y, z-1/2$ ; ii)  $1/2-x, y-1/2, z-1/2$ ; iii)  $x-1/2, 7/2-y, z$ ; iv)  $-x, 3-y, z+1/2$ ; v)  $2-x, -y-1, z+1/2$ ; vi)  $3/2-x, y+1/2, z+1/2$ ; vii)  $x+1/2, -y-3/2, z$ ; viii)  $2-x, -y-1, z-1/2$ .

**Table S3** Hydrogen-bonding geometry (Å, °) for LOF 2

| D–H···A                     | d(D–H) | d(H···A) | d(D···A) | ∠D–H···A |
|-----------------------------|--------|----------|----------|----------|
| C18–H18B···O4 <sup>ix</sup> | 0.96   | 2.49     | 3.440(8) | 169      |
| C18–H18A···O7               | 0.96   | 2.29     | 2.718(4) | 106      |

Symmetry code: ix)  $-x-1/2, y+5/2, z+1/2$ .

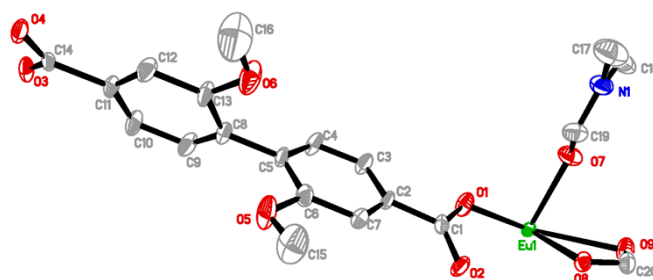

**Fig. S1** ORTER drawing (at 50% probability) of the asymmetric unit for LOF 1 (Hydrogen

atoms are omitted for clarity).

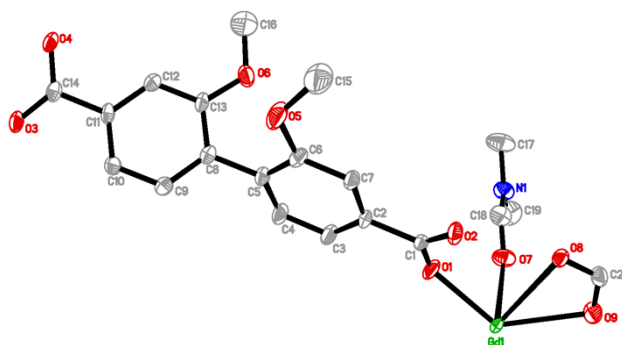

**Fig. S2** ORTEP drawing (at 50% probability) of the asymmetric unit for LOF 2 (Hydrogen atoms are omitted for clarity).

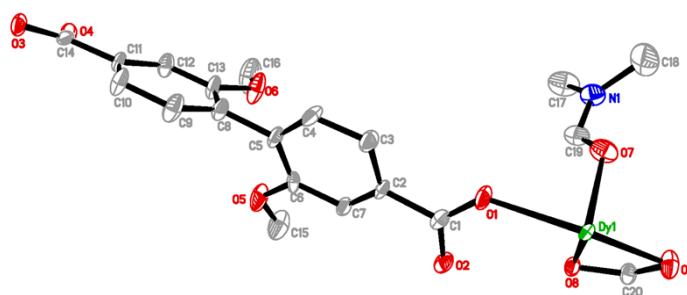

**Fig. S3** ORTEP drawing (at 50% probability) of the asymmetric unit for LOF 3 (Hydrogen atoms are omitted for clarity).

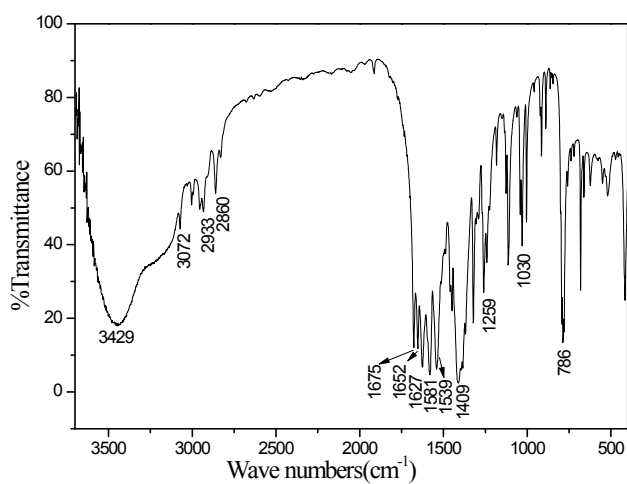

**Fig. S4** The IR spectra of LOF 1.

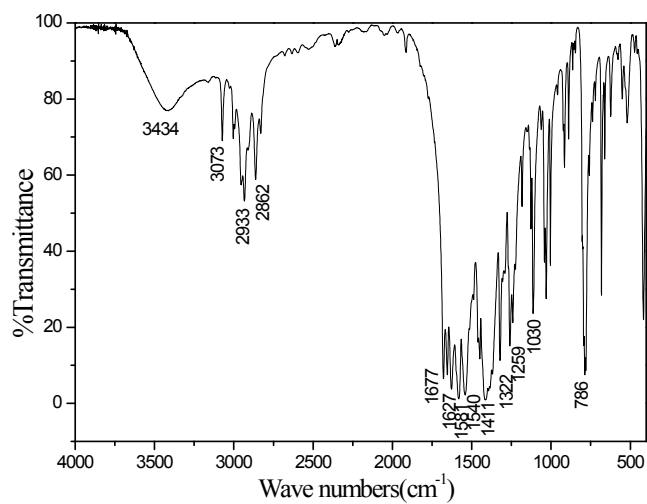

**Fig. S5** The IR spectra of LOF 2.

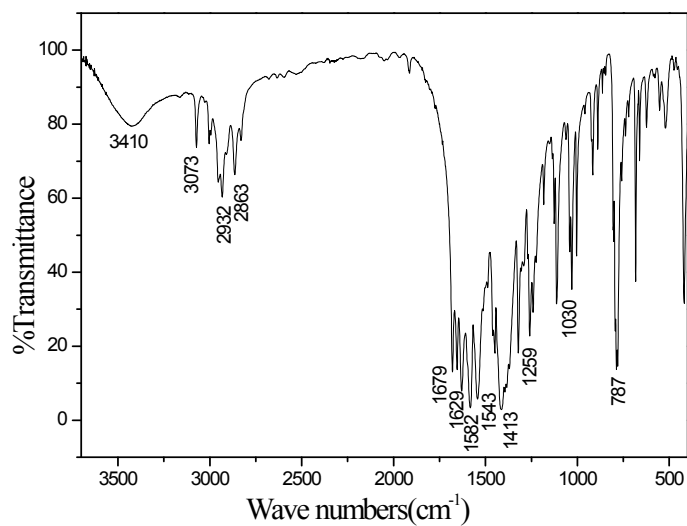

**Fig. S6** The IR spectra of LOF 3.

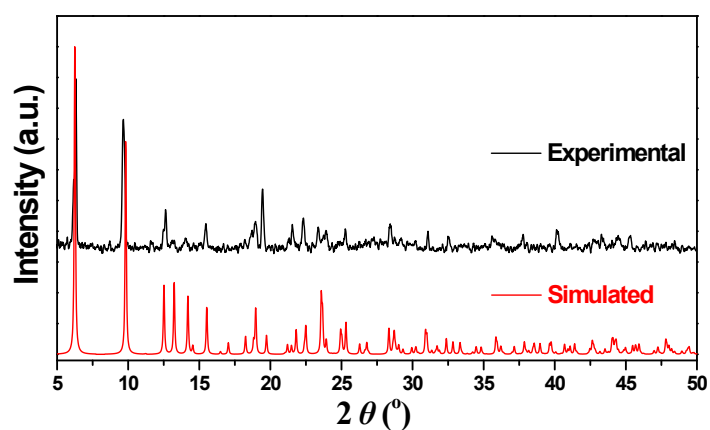

**Fig. S7** Experimental and simulated powder X-ray diffraction patterns of LOF 1.

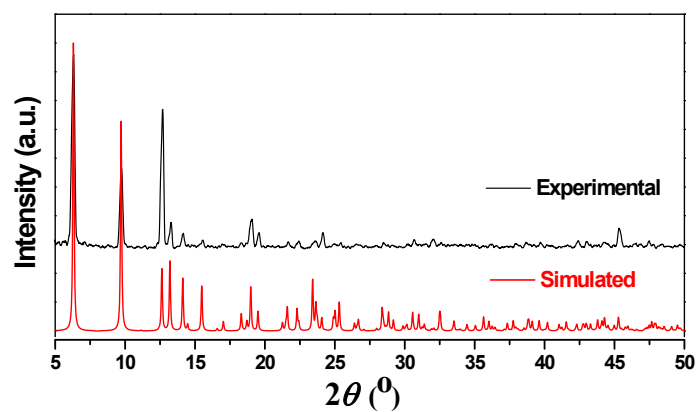

Fig. S8 Experimental and simulated powder X-ray diffraction patterns of LOF 2.

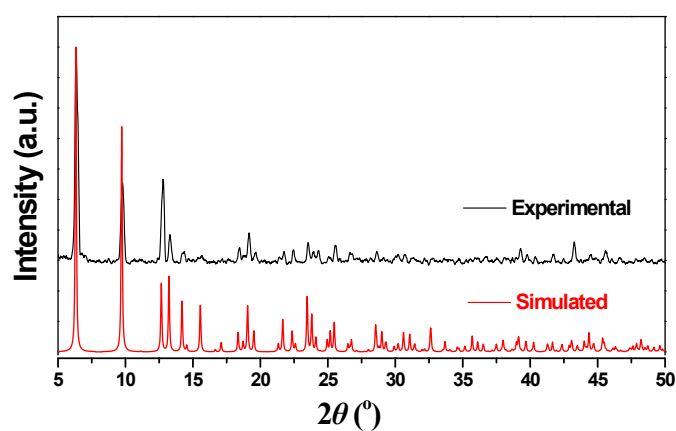

Fig. S9 Experimental and simulated powder X-ray diffraction patterns of LOF 3.

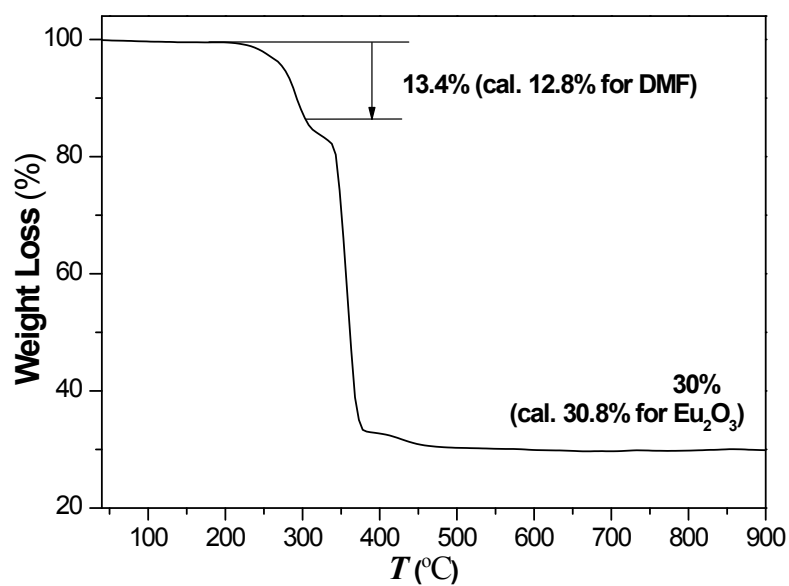

Fig. S10 TGA curve for LOF 1.

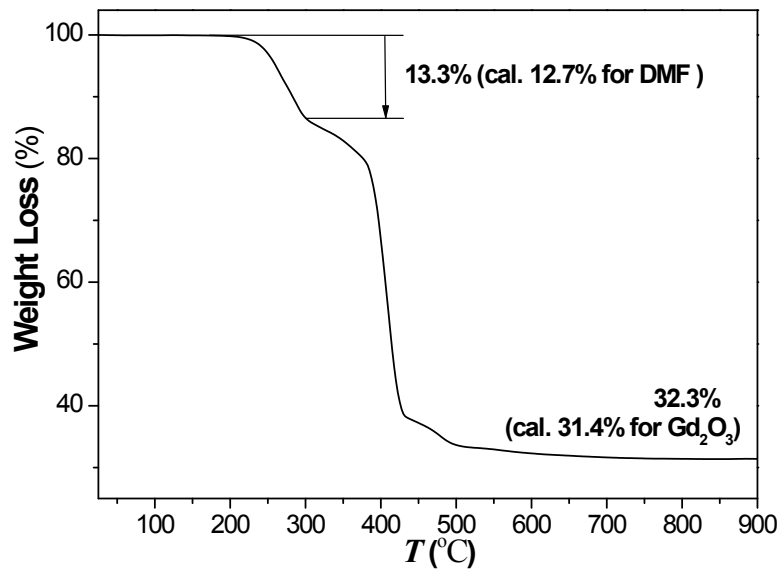

**Fig. S11** TGA curve for LOF 2.

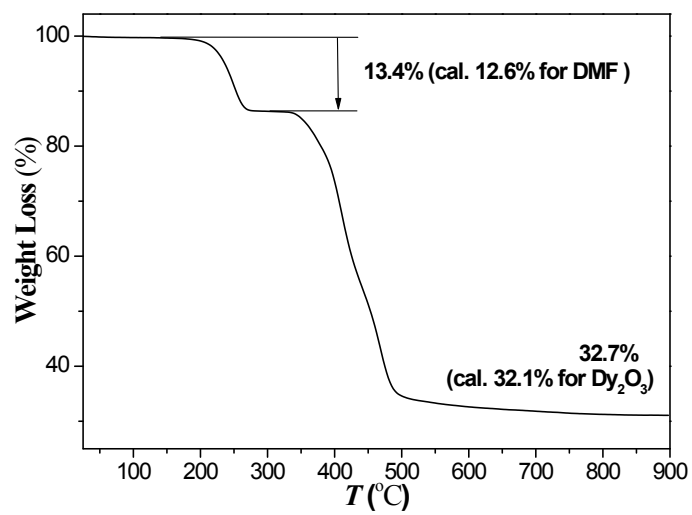

**Fig. S12** TGA curve for LOF 3.

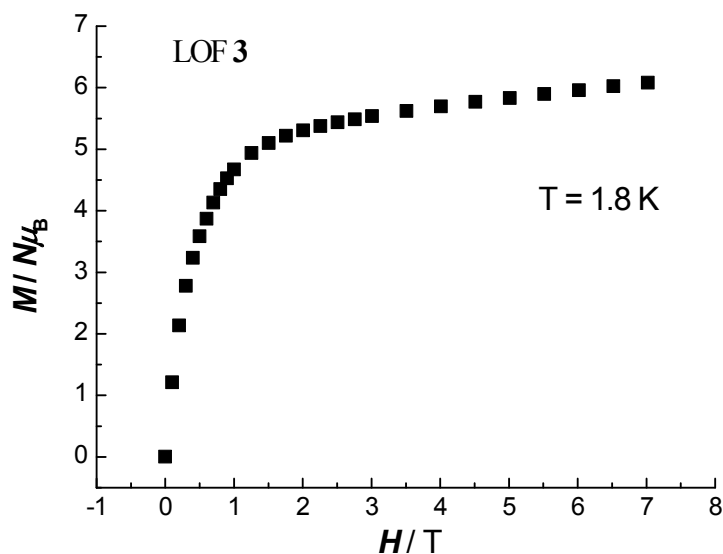

Fig. S13 M-H plot for **3** at 1.8 K.

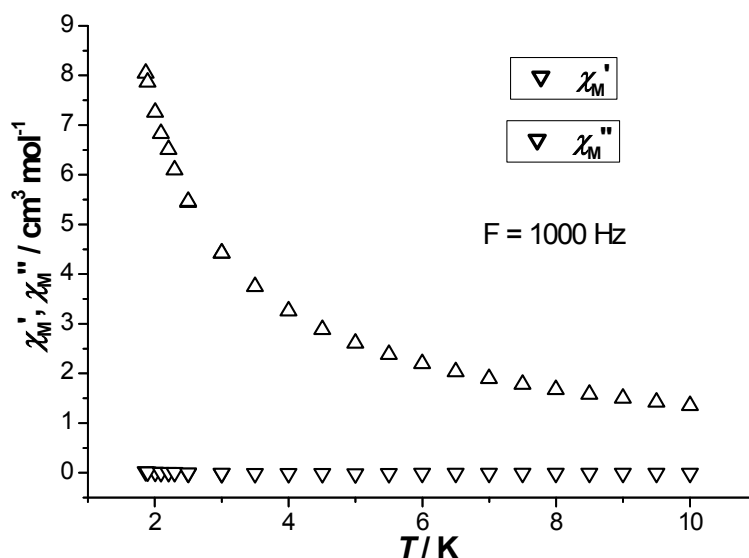

Fig. S14 Variable-temperature AC magnetic susceptibilities of **3** in an ac field of 5 Oe with an oscillating frequency of 1000 Hz.

## References

- 1 (a) H. R. Frank, P. E. Fanta and D. S. Tarbell, *J. Am. Chem. Soc.*, 1948, **70**, 2314; (b) K. Sagi, T. Nakagawa, M. Yamanashi, S. Makino, M. Takahashi, M. Takayanagi, K. Takenaka, N. Suzuki, S. Oono, N. Kataoka, K. Ishikawa, S. Shima, Y. Fukuda, T. Kayahara, S. Takehana, Y. Shima, K. Tashiro, H. Yamamoto, R. Yoshimoto, S. Iwata, T. Tsuji, K. Sakurai and M. Shoji, *J. Med. Chem.*, 2003, **46**, 1845; (c) R. J. Pilling and D. A.



Whiting, *J. Chem. Soc., Perkin Trans. I*, 1999, 2077; (d) P. Brenans and C. Prost, *Compt. Rend.*, 1924, **178**, 1285.

2 (a) A. Speicher, J. Kolz and R. P. Sambanje, *Synthesis*, 2002, 2503; (b) G. Dunet and P. Knochel, *Synlett*, 2007, 1383.

3 (a) T. R. Govindachari, N. Viswanathan, K. R. Ravindranath and B. Anjaneyulu, *Indian J. Chem.*, 1973, **11**, 1081; (b) M. A. Rizzacasa and M. V. Sargent, *Aust. J. Chem.*, 1988, **41**, 1087.
